# Supplementary material for: Clinician Concepts of Cure in Adult Relapsed and Refractory Philadelphia-Negative B Cell Precursor Acute Lymphoblastic Leukemia: A Delphi Study
Source: Springer Nature journal article supplement (doi:10.1007/s12325-019-00910-z), 2019-03-07
Supplement: MOESM1 [file 12325_2019_910_MOESM1_ESM.docx]

**Supplementary file – survey questions**

***About you and your clinic***

Q1. What is your main clinical role?

Q2. Which type of center best describes your institution?

Q3. Do you or your team conduct allogenic bone marrow transplants?

Q4. How many years’ experience do you have in treating adults with refractory or relapsed Philadelphia chromosome-negative (Ph-) precursor B cell acute lymphoblastic leukemia (ALL)?

Q5. In the **last 12 months**, how many patients have you and your team treated with the following conditions?

- Precursor B cell ALL
- Ph− precursor B cell ALL
- Relapsed or refractory Ph− precursor B cell ALL

***Treatment intent, treatment outcomes, and definitions of treatment success***

Q6. Do you use a consistent definition of treatment success for patients with relapsed or refractory Ph- precursor B cell ALL in clinical practice? Please elaborate

Q7. What terminology do you use with patients with relapsed or refractory Ph- precursor B cell ALL to describe the nature of the therapeutic benefit they may expect? Please describe

Q8. Do you have a definition of “cure” that you use in clinical practice when managing patients with relapsed or refractory Ph- precursor B cell ALL? Please elaborate

Q9. Do you ever specifically use the word “cure” with your patients with relapsed or refractory Ph- precursor B cell ALL? Please elaborate

Q10. Given your experience of treating adults with relapsed and refractory Ph- B cell ALL, which of the following would you consider to be a successful treatment outcome? Please select all options that apply; if you select ‘other’, please elaborate

- Achievement of complete remission
- Eradication of cancerous cells (i.e., molecular MRD negative)
- Prolongation of survival
- Improvement of quality of life
- Becoming eligible for hematopoietic stem cell transplant (HSCT)
- Other

Q11. What factors and/or patient characteristics would prompt you to treat a patient with relapsed or refractory Ph- precursor B cell ALL with curative intent? Please select yes or no for all factors and provide justification for your selection

- Age
- Number of prior relapses
- Length of time between the start of salvage therapy and achieving remission
- Length of time in remission (i.e., time from start of remission to relapse)
- Number of salvage cycles
- Eligibility for HSCT
- ECOG performance status
- Other (e.g., vital organ dysfunction, adverse cytogenetics) please describe

Q12. What percentage of your patients with relapsed or refractory Ph- precursor B cell ALL do you treat with curative intent? Please provide the percentage and an explanation or additional comments

Q13. Whilst the concept of “cure” can mean different things to different people (explored below), what percentage of adults with relapsed or refractory Ph- precursor B cell ALL would you consider are “cured”? Please provide the percentage and an explanation or additional comments

Q14. Which of the following statements about HSCT are true when considering a patient to be “cured”?

- They have to have **undergone successful** HSCT before I would consider them “cured” (please elaborate)
- They have to be **eligible** for HSCT before I would consider them “cured” (please elaborate)
- They don't necessarily have to be eligible for or to have undergone successful HSCT for me to consider them "cured" (please elaborate)

***Disease that is particularly difficult to treat***

Q15. What factors and/or characteristics influence whether you consider a patient to have “particularly difficult to treat” relapsed or refractory Ph- precursor B cell ALL? Please select yes or no for all factors and provide justification for your selection

- Age
- Number of prior relapses
- Length of time between the start of salvage therapy and achieving remission
- Length of time in remission (i.e., time from start of remission to relapse)
- Number of salvage cycles
- Eligibility for HSCT
- ECOG performance status
- Other (e.g., vital organ dysfunction, adverse cytogenetics) please describe

Q16. Do you think about this subgroup of “particularly difficult to treat” patients any differently from the overall population of patients with relapsed or refractory Ph- precursor B cell ALL?

- In terms to your approach to treatment: Please provide an explanation
- In terms of determining successful treatment outcomes: Please provide an explanation

Q17. Whilst the concept of “cure” can mean different things to different (explored below), what percentage of patients with “particularly difficult to treat” relapsed or refractory Ph- precursor B cell ALL would you consider are “cured”? Please provide the percentage and an explanation or additional comments

***Successful treatment outcomes in relation to the treatment pathway***

Q18. For the overall group of patients who have relapsed or refractory Ph- precursor B cell ALL, what is your intended curative outcome of treatment once patients have received salvage chemotherapy? Please rank the following options from 1 to 3, 1 being the most important and provide further comments

- Complete remission
- Eradication of cancerous cells – molecular MRD negative
- Prolongation of survival

Q19. a) Is this any different for the subgroup of patients with disease that is “particularly difficult to treat”?

b) If yes, please rank the three criteria. Please rank the following options from 1 to 3, 1 being the most important and provide further comments

- Complete remission
- Eradication of cancerous cells – molecular MRD negative
- Prolongation of survival

Q20. For the overall group of patients who have relapsed or refractory Ph- precursor B cell ALL, what is the minimum period from the start of salvage therapy that you would consider a patient to be “cured” according to each of the following criteria? Please provide the number of months or years for each option and elaborate

- Complete remission (i.e., what is the minimum period a patient needs to remain free of relapse/in remission for you to consider them "cured"?)
- Eradication of cancerous cells (i.e., what is the minimum period that cancerous cells need to remain eradicated for you to consider a patient "cured"?)
- Prolongation of survival (i.e., what is the minimum period that a patient needs to survive for you to consider them "cured"?)

Q21. Is this any different for the subgroup of patients with disease that is “particularly difficult to treat”?

If yes, please indicate the times for each criterion below. Please elaborate or provide further comments

- Complete remission (i.e., what is the minimum period a patient needs to remain free of relapse/in remission for you to consider them "cured"?)
- Eradication of cancerous cells (i.e., what is the minimum period that cancerous cells need to remain eradicated for you to consider a patient "cured"?)
- Prolongation of survival (i.e., what is the minimum period that a patient needs to survive for you to consider them "cured"?)

Q22. At what time point would you start to assess whether the treatment has been successful (i.e., the point at which you start to look for “cure”)? Please select one of the following options; if you select ‘other’, please elaborate

- When they achieve complete response
- At the start of salvage therapy
- At the end of salvage therapy
- When they become eligible for HSCT
- When they start HSCT
- Other

Q23. Having achieved a successful treatment outcome (i.e., complete remission, eradication of cancerous cells or prolongation of survival), how often do you assess disease status to determine whether further treatment is needed? Please provide a frequency, months or years
